# Supplementary material
Source: ML conference proceedings conference paper supplement (https://proceedings.mlr.press/v32/soma14.html)
Supplement: Supplementary file 1 [file soma14-supp.pdf]

# Supplementary Materials

## A Proof of Theorem 2.1

Let  $b^*$  be an optimal solution for a given instance of the problem. We first examine properties of GREEDYPROCEDURE that hold for *arbitrary*  $b_0$ . We then show that there exists *some*  $b_0$  in the enumeration step such that GREEDYPROCEDURE returns  $b$  with  $f(b) \geq (1 - 1/e)f(b^*)$ , which proves Theorem 2.1.

Let us fix an initial solution  $b_0$ , and analyze behavior of GREEDYPROCEDURE with input  $b_0$ . We denote by  $b_i$  the tentative solution  $b$  at the beginning of the  $i$ th iteration and denote by  $s_i$  and  $k_i$   $s$  and  $k$  chosen in the  $i$ th iteration, respectively. Assume that GREEDYPROCEDURE first has not updated the tentative solution  $b$  in the  $L$ th trial. Equivalently, let  $L$  be the minimum number such that  $b_L = b_{L+1}$  and  $b_i < b_{i+1}$  for  $i = 1, \dots, L - 1$ . Note that if such a situation never happens during the execution of GREEDYPROCEDURE, define  $L$  to be the number of iterations.

**Lemma A.1.** *Without loss of generality, we may assume that  $b(s_L) + k_L \leq b^*(s_L)$ .*

*Proof.* Suppose that  $b(s_L) + k_L > b^*(s_L)$ . Let us consider a modified instance in which the capacity of  $s_L$  is decreased to  $b(s_L) + k_L - 1$ . The optimal value is unchanged by this modification because  $b^*$  is still feasible and optimal. Furthermore, GREEDYPROCEDURE returns the same solution (with respect to same  $b_0$ ). Thus it suffices to analyze the algorithm in the modified instance. Repeating this argument completes the proof of this lemma.  $\square$

Consider the  $i$ th iteration of the algorithm. For simplicity, we denote  $\Delta(b_i, s_i, k_i)$  by  $\Delta_i$ ,  $\delta(b_i, s_i, k_i)$  by  $\delta_i$ , and  $w(s_i)$  by  $w_i$ . Note that  $f(b_i) = f(b_0) + \sum_{j=1}^{i-1} \Delta_j$  for  $i = 1, \dots, L$ . Let  $B' := B - w \cdot b_0$ .

**Lemma A.2.** *For  $i = 1, \dots, L$ , we have  $\Delta_i \geq \frac{w_i k_i}{B'} (f(b^*) - f(b_i))$ .*

*Proof.* Let us denote  $b_i \vee b^* = b_i + \sum \alpha_s \chi_s$ , where the sum is taken over  $s$  in  $\text{supp}^+(b^* - b_i)$  and  $\alpha_s := b^*(s) - b_i(s)$ . Since  $b_i \vee b^*(s) \chi_s = b_i + \alpha_s \chi_s$  for each  $s \in \text{supp}^+(b^* - b_i)$ , (4) implies

$$\begin{aligned} f(b_i \vee b^*) &\leq f(b_i) + \sum_{s \in \text{supp}^+(b^* - b_i)} (f(b_i + \alpha_s \chi_s) - f(b_i)) \\ &\leq f(b_i) + \sum_{s \in \text{supp}^+(b^* - b_i)} w(s) \alpha_s \delta_i, \end{aligned}$$

where the last inequality follows from the fact that  $(f(b_i + k \chi_s) - f(b_i)) / (w(s)k) \leq \delta_i$  for all  $s \in S$  and  $k$ . Since  $\sum w(s) \alpha_s$  is at most  $B'$  and  $f(b^*) \leq f(b_i \vee b^*)$  by the monotonicity of  $f$ , it holds that  $f(b^*) \leq f(b_i) + \delta_i B'$ . Therefore, we obtain  $\delta_i \geq (f(b^*) - f(b_i)) / B'$ .  $\square$

Applying Lemma A.2 repeatedly, we have the following lemmas.

**Lemma A.3.** For  $i = 1, \dots, L$ , we have  $f(b^*) - f(b_i) \leq (f(b^*) - f(b_0)) \cdot \prod_{j=1}^i (1 - w_j k_j / B')$ .

*Proof.* We prove this lemma by induction on  $i$ . For  $i = 1$ , then the inequality holds because  $\Delta_1 \geq w_1 k_1 (f(b^*) - f(b_0)) / B'$  by Lemma A.2. For  $i > 1$ , we have

$$\begin{aligned}
f(b^*) - f(b_0) - \sum_{j=1}^i \Delta_j &= f(b^*) - f(b_0) - \sum_{j=1}^{i-1} \Delta_j - \Delta_i \\
&\leq f(b^*) - f(b_0) - \sum_{j=1}^{i-1} \Delta_j - \frac{w_i k_i}{B'} \left( f(b^*) - f(b_0) - \sum_{j=1}^{i-1} \Delta_j \right) \quad (\text{by Lemma A.2}) \\
&= \left( 1 - \frac{w_i k_i}{B'} \right) \left( f(b^*) - f(b_0) - \sum_{j=1}^{i-1} \Delta_j \right) \\
&\leq \left( 1 - \frac{w_i k_i}{B'} \right) \cdot (f(b^*) - f(b_0)) \cdot \prod_{j=1}^{i-1} \left( 1 - \frac{w_j k_j}{B'} \right), \\
&\hspace{15em} (\text{by the induction hypothesis})
\end{aligned}$$

which completes the proof.  $\square$

**Lemma A.4.** It holds that  $f(b^*) - f(b_i) \leq (f(b^*) - f(b_0)) / e$ .

*Proof.* Let  $\varphi(x) = \ln(1 - x)$ . Note that  $\varphi$  is concave in  $[0, 1)$ . By Jensen's inequality, we have  $\sum_{i=1}^L \varphi(x_i) / L \leq \varphi(\sum_{i=1}^L x_i / L)$  for  $x_1, \dots, x_L \in [0, 1)$ . Putting  $x_i := w_i k_i / B'$ , we obtain

$$\frac{1}{L} \sum_{i=1}^L \ln \left( 1 - \frac{w_i k_i}{B'} \right) \leq \ln \left( 1 - \frac{1}{L} \sum_{i=1}^L \frac{w_i k_i}{B'} \right) \leq \ln \left( 1 - \frac{1}{L} \right), \quad (1)$$

where the last inequality follows since  $\sum_{i=1}^L w_i k_i \geq B'$  and  $\varphi$  is a monotonically decreasing function. Thus we have

$$\prod_{i=1}^L \left( 1 - \frac{w_i k_i}{B'} \right) \leq \left( 1 - \frac{1}{L} \right)^L \leq \frac{1}{e}. \quad (2)$$

Combining this fact and Lemma A.3 completes the proof.  $\square$

We now move to proving that the greedy procedure returns a  $(1 - 1/e)$ -approximate solution for some  $b_0$  in the enumeration step. If the optimal solution  $b^*$  satisfies  $|\text{supp}^+(b^*)| \leq 3$ , it can be found in the enumeration step. Therefore, we assume that all the optimal solutions have more than three positive components. Let  $s_1^*, s_2^*, s_3^*$  be elements in  $S$  satisfying:

$$s_i^* \in \underset{s \in S \setminus \{s_1^*, \dots, s_{i-1}^*\}}{\text{argmax}} \Delta \left( \bigvee_{j=1}^{i-1} b^*(s_j^*) \chi_{s_j^*}, s, b^*(s) \right)$$

for  $i = 1, 2, 3$ . Since the size of the support of  $b^*$  is more than three, such  $s_1^*, s_2^*$  and  $s_3^*$  clearly exist.

**Lemma A.5.** For the feasible solution  $b_0$  with the support  $\{s_1^*, s_2^*, s_3^*\}$  satisfying  $b_0(s_i^*) = b^*(s_i^*)$  for  $1 \leq i \leq 3$ , we have  $\Delta_L \leq f(b_0)/3$ .

*Proof.* It follows that  $\Delta_L = f(b_L + k_L \chi_{s_L}) - f(b_L) \leq f(b_L \vee b^*(s_L) \chi_{s_L}) - f(b_L)$  since  $b_L(s_L) + k_L \leq b^*(s_L)$ . By Lemma 2.2,  $\Delta_L$  is at most  $f(b^*(s_L) \chi_{s_L}) - f(0) = f(b^*(s_L) \chi_{s_L})$ , and hence  $\Delta_L \leq f(b^*(s_1^*) \chi_{s_1^*}) = \Delta(0, s_1^*, b^*(s_1^*))$  by the choice of  $s_1^*$ . Similarly, by the choices of  $s_2^*$  and  $s_3^*$ , we have  $\Delta_L \leq \Delta(b^*(s_1^*) \chi_{s_1^*}, s_2^*, b^*(s_2^*))$  and  $\Delta_L \leq \Delta(b^*(s_1^*) \chi_{s_1^*} \vee b^*(s_2^*) \chi_{s_2^*}, s_3^*, b^*(s_3^*))$ . Adding these inequalities, we obtain  $\Delta_L \leq f(b_0)/3$ .  $\square$

We are now ready to prove Theorem 2.1. Since  $f(b) \geq f(b_0) + \sum_{i=1}^L \Delta_i - \Delta_L$ , Lemmas A.4 and A.5 imply that

$$\begin{aligned} f(b) &\geq (1 - 1/3)f(b_0) + (1 - 1/e)(f(b^*) - f(b_0)) \\ &\geq (1 - 1/e)f(b^*) \end{aligned}$$

for the initial solution  $b_0$  described in Lemma A.5. This completes the proof of Theorem 2.1.

## B Proof of Lemmas

### B.1 Proof of Lemma 2.2

*Proof.* If  $k \leq x(s)$  then both sides are 0. If  $x(s) < k \leq y(s)$  then the inequality (3) is equivalent to  $f(x \vee k \chi_s) - f(x) \geq 0$ , which is valid by monotonicity. Lastly, if  $k > y(s)$  then we have  $f(x \vee k \chi_s) + f(y) \geq f(y \vee k \chi_s) + f(x)$  by submodularity, which directly implies (3).  $\square$

### B.2 Proof of Lemma 2.3

*Proof.* We prove this lemma by induction on the size of  $\text{supp}^+(y - x)$ . If  $|\text{supp}^+(y - x)| = 0$ , that is,  $x \vee y = x$ , then (4) is trivial. Suppose that there is an index  $s \in \text{supp}^+(y - x)$ . We define  $y_1 = y - y(s) \chi_s$ . Then  $y = y_1 \vee y(s) \chi_s$  and  $y_1 \wedge y(s) \chi_s = 0$  hold. By submodularity of  $x \vee y_1$  and  $x \vee y(s) \chi_s$ , we have

$$f(x \vee y_1) + f(x \vee y(s) \chi_s) \geq f(x \vee y) + f((x \vee y_1) \wedge (x \vee y(s) \chi_s)).$$

Since it holds that

$$(x \vee y_1) \wedge (x \vee y(s) \chi_s) = x \vee (y_1 \wedge y(s) \chi_s) = x \vee 0 = x,$$

the above inequality implies that

$$f(x \vee y_1) + f(x \vee y(s) \chi_s) - f(x) \geq f(x \vee y).$$

Therefore, applying the induction hypothesis to  $x$  and  $y_1$ , we obtain (4). Thus the statement holds.  $\square$

### B.3 Proof of Lemma 4.1

*Proof.* By simple algebra, we can easily check that

$$f(b + \chi_s) - f(b) = p_s^{(b(s)+1)} \sum_{t \in \Gamma(s)} \prod_{v \in \Gamma(t)} \prod_{i=1}^{b(v)} (1 - p_v^{(i)}), \quad (3)$$

$$f(b + 2\chi_s) - f(b + \chi_s) = (1 - p_s^{(b(s)+1)}) p_s^{(b(s)+2)} \sum_{t \in \Gamma(s)} \prod_{v \in \Gamma(t)} \prod_{i=1}^{b(v)} (1 - p_v^{(i)}). \quad (4)$$

Let  $\alpha := \sum_{t \in \Gamma(s)} \prod_{v \in \Gamma(t)} \prod_{i=1}^{b(v)} (1 - p_v^{(i)})$  for simplicity of notations. Then we have  $f(b + \chi_s) - f(b) - (f(b + 2\chi_s) - f(b + \chi_s)) = p_s^{(b(s)+1)} \alpha - p_s^{(b(s)+2)} (1 - p_s^{(b(s)+1)}) \alpha \geq \alpha (p_s^{(b(s)+2)} - p_s^{(b(s)+2)} (1 - p_s^{(b(s)+2)})) = \alpha (p_s^{(b(s)+2)})^2 \geq 0$ .  $\square$

## C Pseudocode of Algorithm

---

### Algorithm 3 SIMPLEGREEDYPROCEDUREFORCOMPETITORMODEL

---

```

1: for each  $t \in T$  do
2:   Let  $\lambda := 1$ 
3:   for  $k = 1$  to  $1 + \max_{s \in \Gamma(t)} \tilde{b}(s)$  do
4:     Let  $\phi_k(t) := 1$  and  $\lambda_{t,k} := \lambda \left(1 - \prod_{s \in \Gamma(t): \tilde{b}(s) \geq k} (1 - \tilde{p}_s^{(k)})\right)$ .
5:     Let  $\lambda := \lambda \prod_{s \in \Gamma(t): \tilde{b}(s) \geq k} (1 - \tilde{p}_s^{(k)})$ .
6:   end for
7: end for
8: Let  $b := 0$ .
9: for  $i = 1$  to  $B$  do
10:  Choose  $s$  maximizing  $\sum_{t \in \Gamma(s)} \sum_k \lambda_{t,k} r_{s,k}^{(b(s)+1)} \phi_k(t)$ .
11:  Let  $b(s) := b(s) + 1$ .
12:  for  $t \in \Gamma(s)$  do
13:    for  $k = 1$  to  $1 + \max_{s \in \Gamma(t)} \tilde{b}(s)$  do
14:      Let  $\phi_k(t) := (1 - r_{s,k}^{(b(s))}) \phi_k(t)$ .
15:    end for
16:  end for
17: end for
18: return  $b$ 

```

---
